# Supplementary material
Source: PubMed Central journal article supplement (PMC6094940)
Supplement: NIHMS981730-supplement-Fig_1.pdf [file NIHMS981730-supplement-Fig_1.pdf]

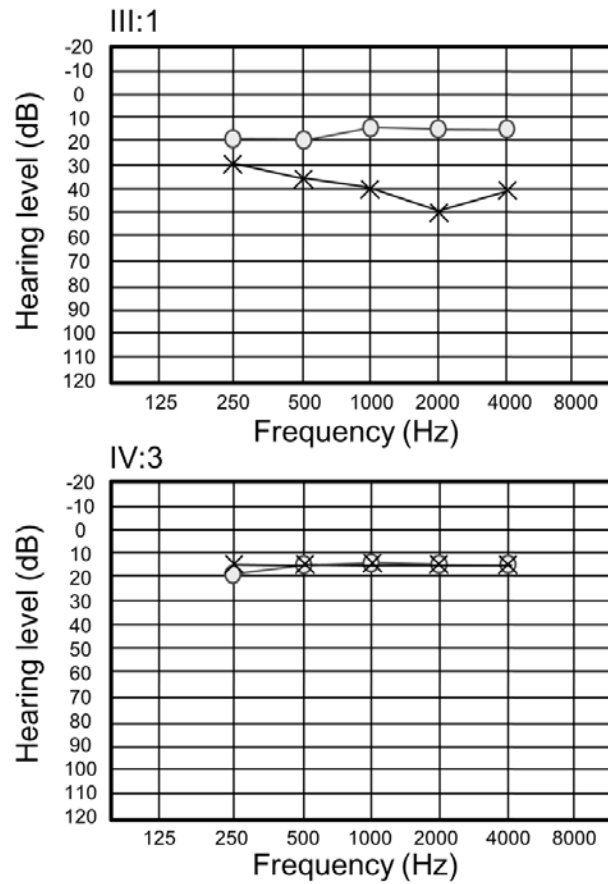

**Supplementary Figure 1: Pure-tone audiometry audiograms for family members III:1 (top; age 43) and IV:3 (bottom; age 17).** x represents the air conduction results for the left ear and o for the right ear. Bone conduction measurements were overlapping. III:1 shows a mild-to-moderate impairment on the left ear, which is increased in threshold compared to presbycusis, according to the ISO 7029 standard (95<sup>th</sup> percentile) for the same age and gender.
