# Supplementary material
Source: PubMed Central journal article supplement (PMC6094940)
Supplement: NIHMS981730-supplement-Table_1.pdf [file NIHMS981730-supplement-Table_1.pdf]

| Chr                                                                  | Start     | End       | Ref | Alt | Gene.refGene | GeneDetail.refGene |
|----------------------------------------------------------------------|-----------|-----------|-----|-----|--------------|--------------------|
| <b>Homozygous variants in regions mapped by homozygosity mapping</b> |           |           |     |     |              |                    |
| 1                                                                    | 165173160 | 165173160 | A   | G   | LMX1A*       | .                  |
| 5                                                                    | 112179055 | 112179055 | T   | G   | APC**        | .                  |
| <b>Genome-wide homozygous variants</b>                               |           |           |     |     |              |                    |
| 5                                                                    | 1411381   | 1411381   | G   | A   | SLC6A3**     | .                  |
| 6                                                                    | 43336941  | 43336941  | G   | A   | ZNF318**     | .                  |
| 6                                                                    | 116442293 | 116442293 | C   | T   | COL10A1**    | .                  |
| <b>X-linked variants</b>                                             |           |           |     |     |              |                    |
| X                                                                    | 49126604  | 49126604  | G   | A   | PPP1R3F***   | .                  |
| X                                                                    | 111698023 | 111698023 | C   | A   | RTL4**       | .                  |
| <b>Possible compound heterozygous variants (Phase unknown)</b>       |           |           |     |     |              |                    |
| 1                                                                    | 223177972 | 223177972 | G   | A   | DISP1**      | .                  |
| 1                                                                    | 223164937 | 223164937 | A   | G   | DISP1**      | .                  |
| 8                                                                    | 144812619 | 144812619 | C   | T   | FAM83H**     | .                  |
| 8                                                                    | 144808567 | 144808567 | G   | A   | FAM83H**     | .                  |

\*Segregates with hearing loss in the family

\*\*Does not segregate with hearing loss in the family

\*\*\*Untested for segregation

| AAChange.refGene          | Func.ensGene | Gene.ensGene.1 | GeneDetail.ensGene | ExonicFunc.ensGene | AAChange.ensGene   |
|---------------------------|--------------|----------------|--------------------|--------------------|--------------------|
| LMX1A:NM_001174069:exonic |              | ENSG000001.1   |                    | nonsynonym         | ENSG00000162761:EI |
| APC:NM_001127511:exonic   |              | ENSG000001.1   |                    | nonsynonym         | ENSG00000134982:EI |
| SLC6A3:NM_001044:exonic   |              | ENSG000001.1   |                    | nonsynonym         | ENSG00000142319:EI |
| ZNF318:NM_014345:exonic   |              | ENSG000001.1   |                    | nonsynonym         | ENSG00000171467:EI |
| COL10A1:NM_000493:exonic  |              | ENSG000001.1   |                    | nonsynonym         | ENSG00000123500:EI |
| PPP1R3F:NM_033215:exonic  |              | ENSG000000.1   |                    | nonsynonym         | ENSG00000049769:EI |
| RTL4:NM_001004308:exonic  |              | ENSG000001.1   |                    | nonsynonym         | ENSG00000187823:EI |
| DISP1:NM_001350630:exonic |              | ENSG000001.1   |                    | nonsynonym         | ENSG00000154309:EI |
| DISP1:NM_032890:exonic    |              | ENSG000001.1   |                    | nonsynonym         | ENSG00000154309:EI |
| FAM83H:NM_198488:exonic   |              | ENSG000001.1   |                    | nonsynonym         | ENSG00000180921:EI |
| FAM83H:NM_198488:exonic   |              | ENSG000001.1   |                    | nonsynonym         | ENSG00000180921:EI |

| avsnp147    | SIFT_score | SIFT_pred | Polyphen2_HDIV_score | Polyphen2_HDIV_pred | Polyphen2_HVAR_score | Polyphen2_HVAR_pred | LRT_score | LRT_pred | MutationTaster_score |
|-------------|------------|-----------|----------------------|---------------------|----------------------|---------------------|-----------|----------|----------------------|
| rs763320093 | 0          | D         | 1                    | D                   | 0.996                | D                   | 0         | D        | 1                    |
| rs757073062 | 0.339      | T         | 0.947                | P                   | 0.707                | P                   | 0         | D        | 0.996                |
| rs756571192 | 0.006      | D         | 0.064                | B                   | 0.098                | B                   | 0         | D        | 1                    |
| .           | 0          | D         | 1                    | D                   | 0.968                | D                   | .         | .        | 0.986                |
| .           | 0          | D         | 1                    | D                   | 1                    | D                   | 0         | D        | 1                    |
| rs782119228 | 0.354      | T         | 0.365                | B                   | 0.133                | B                   | 0.003     | U        | 1                    |
| .           | 0.051      | T         | 0.206                | B                   | 0.164                | B                   | 0.2       | N        | 1                    |
| rs150111973 | 0.055      | T         | 0.977                | D                   | 0.581                | P                   | 0         | N        | 1                    |
| rs139954139 | 0.026      | D         | 0.979                | D                   | 0.771                | P                   | 0         | D        | 1                    |
| rs375875154 | 0.003      | D         | 0.84                 | P                   | 0.429                | B                   | 0.078     | N        | 0.945                |
| rs781867409 | 0.001      | D         | 0.816                | P                   | 0.048                | B                   | 0.007     | U        | 1                    |

| MutationTaster_pred | MutationAssessor_score | MutationAssessor_pred | FATHMM_score | FATHMM_pred | PROVEAN_score | PROVEAN_pred | CADD_phred | DANN_score | fathmm.MKL_coding_score | fathmm.MKL_coding_pred |
|---------------------|------------------------|-----------------------|--------------|-------------|---------------|--------------|------------|------------|-------------------------|------------------------|
| D                   | 1.83                   | L                     | -2.57        | D           | -4.19         | D            | 26.8       | 0.998      | 0.991                   | D                      |
| D                   | 0.895                  | L                     | -2.41        | D           | 0.27          | N            | 22.8       | 0.987      | 0.807                   | D                      |
| D                   | 1.35                   | L                     | -1.1         | T           | -3.08         | D            | 23.6       | 0.997      | 0.825                   | D                      |
| D                   | 0.55                   | N                     | 3.75         | T           | -0.99         | N            | 23         | 0.985      | 0.674                   | D                      |
| D                   | 3.985                  | H                     | -6.28        | D           | -5.89         | D            | 24         | 0.993      | 0.963                   | D                      |
| D                   | 0                      | N                     | 0.37         | T           | -0.29         | N            | 16.4       | 0.972      | 0.249                   | N                      |
| N                   | 1.04                   | L                     | 0.54         | T           | -0.51         | N            | 21.3       | 0.989      | 0.025                   | N                      |
| D                   | 1.385                  | L                     | 2.33         | T           | -2.33         | N            | 27.6       | 1          | 0.99                    | D                      |
| D                   | 1.15                   | L                     | -3.03        | D           | -1.89         | N            | 24.6       | 0.998      | 0.991                   | D                      |
| N                   | 1.795                  | L                     | 2.73         | T           | -2.19         | N            | 22.3       | 0.999      | 0.391                   | N                      |
| D                   | 1.04                   | L                     | 1.74         | T           | -4.81         | D            | 23         | 0.999      | 0.701                   | D                      |

|  | MetaSVM_score | MetaSVM_pred | MetaLR_score | MetaLR_pred | integrated_fitCons_score | integrated_confidence_value | GERP.._RS | phyloP7way_vertebrate | phyloP20way_mammalian | phastCons7way_vertebrate | phastCons20way_mammalian |
|--|---------------|--------------|--------------|-------------|--------------------------|-----------------------------|-----------|-----------------------|-----------------------|--------------------------|--------------------------|
|  | 0.655         | D            | 0.739        | D           | 0.487                    | 0                           | 5.14      | 1.062                 | 1.199                 | 0.998                    | 1                        |
|  | 0.072         | D            | 0.606        | D           | 0.706                    | 0                           | 4.81      | 0.991                 | 1.061                 | 1                        | 1                        |
|  | -0.406        | T            | 0.357        | T           | 0.516                    | 0                           | 4.5       | 0.917                 | 0.893                 | 0.999                    | 0.997                    |
|  | -0.945        | T            | 0.013        | T           | 0.243                    | 2                           | 2.96      | 0.846                 | 0.726                 | 0.559                    | 0.779                    |
|  | 0.966         | D            | 0.993        | D           | 0.554                    | 0                           | 5.12      | 0.871                 | 0.935                 | 0.999                    | 0.997                    |
|  | -1.084        | T            | 0.065        | T           | .                        | .                           | 2.6       | 0.546                 | 0.929                 | 0.997                    | 1                        |
|  | -1.014        | T            | 0.103        | T           | .                        | .                           | 1.19      | 0.598                 | 0.935                 | 0.482                    | 0.804                    |
|  | -1.189        | T            | 0.06         | T           | 0.651                    | 0                           | 5.95      | 0.917                 | 0.998                 | 0.983                    | 0.992                    |
|  | 0.652         | D            | 0.755        | D           | 0.638                    | 0                           | 5.64      | 1.062                 | 1.199                 | 1                        | 1                        |
|  | -1.084        | T            | 0.039        | T           | 0.635                    | 0                           | 3.07      | 0.598                 | 0.935                 | 0.432                    | 0.998                    |
|  | -1.012        | T            | 0.045        | T           | 0.66                     | 0                           | 3.94      | 0.913                 | 0.947                 | 0.026                    | 0.016                    |

SiPhy\_29way\_logOdds  
dbscSNV\_ADA\_SCORE  
dbscSNV\_RF\_SCORE

14.785 . .

12.05 . .

14.709 . .

9.486 . .

19.108 . .

8.929 . .

5.811 . .

20.372 . .

16.152 . .

7.962 . .

8.349 . .

Gene description

LIM homeobox transcription factor 1 alpha [Source:HGNC Symbol;Acc:HGNC:6653]

APC, WNT signaling pathway regulator [Source:HGNC Symbol;Acc:HGNC:583]

solute carrier family 6 member 3 [Source:HGNC Symbol;Acc:HGNC:11049]

zinc finger protein 318 [Source:HGNC Symbol;Acc:HGNC:13578]

collagen type X alpha 1 chain [Source:HGNC Symbol;Acc:HGNC:2185]

protein phosphatase 1 regulatory subunit 3F [Source:HGNC Symbol;Acc:HGNC:14944]

retrotransposon Gag like 4 [Source:HGNC Symbol;Acc:HGNC:25214]

dispatched RND transporter family member 1 [Source:HGNC Symbol;Acc:HGNC:19711]

dispatched RND transporter family member 1 [Source:HGNC Symbol;Acc:HGNC:19711]

family with sequence similarity 83 member H [Source:HGNC Symbol;Acc:HGNC:24797]

family with sequence similarity 83 member H [Source:HGNC Symbol;Acc:HGNC:24797]

---

Clinical Genomic Database (CGD) condition description

Genotype

gnomAD\_genome\_ALL

1/1 3.23E-05

Familial adenomatous polyposis; Gardner syndrome; Desmoid disease, here 1/1 .

Parkinsonism-dystonia, infantile

1/1

.

1/1

.

Metaphyseal chondrodysplasia, Schmid type

1/1

.

1/1

.

1/1

.

0/1 0.0009

0/1

.

Amelogenesis imperfecta, type 3

0/1

0.0002

Amelogenesis imperfecta, type 3

0/1

.



| gnomAD_genome_AFR | gnomAD_genome_AMR | gnomAD_genome_ASJ | gnomAD_genome_EAS | gnomAD_genome_FIN | gnomAD_genome_NFE | gnomAD_genome_OTH | gnomAD_exome_ALL | gnomAD_exome_AFR | gnomAD_exome_AMR |
|-------------------|-------------------|-------------------|-------------------|-------------------|-------------------|-------------------|------------------|------------------|------------------|
| 0                 | 0                 | 0                 | 0                 | 0                 | 6.66E-05          | 0                 | 1.63E-05         | 0                | 0                |
| .                 | .                 | .                 | .                 | .                 | .                 | .                 | 4.07E-06         | 0                | 0                |
| .                 | .                 | .                 | .                 | .                 | .                 | .                 | 6.56E-06         | 0                | 0                |
| .                 | .                 | .                 | .                 | .                 | .                 | .                 | .                | .                | .                |
| .                 | .                 | .                 | .                 | .                 | .                 | .                 | 2.58E-05         | 0                | 0                |
| .                 | .                 | .                 | .                 | .                 | .                 | .                 | .                | .                | .                |
| 0                 | 0                 | 0                 | 0                 | 0                 | 0.0019            | 0                 | 0.0003           | 0                | 5.96E-05         |
| .                 | .                 | .                 | .                 | .                 | .                 | .                 | 6.51E-05         | 0                | 0                |
| 0.0001            | 0                 | 0                 | 0                 | 0                 | 0.0003            | 0                 | 0.0004           | 6.59E-05         | 2.98E-05         |
| .                 | .                 | .                 | .                 | .                 | .                 | .                 | 2.66E-05         | 0                | 0                |

| gnomAD_exome_ASJ | gnomAD_exome_EAS | gnomAD_exome_FIN | gnomAD_exome_NFE | gnomAD_exome_OTH | gnomAD_exome_SAS | PopFreqMax | GME_AF  | GME_NWA | GME_NEA |
|------------------|------------------|------------------|------------------|------------------|------------------|------------|---------|---------|---------|
| 0                | 0                | 0                | 2.69E-05         | 0.0002           | 0                | 0          | .       | .       | .       |
| 0                | 0                | 0                | 0                | 0                | 3.25E-05         | 0.0001     | .       | .       | .       |
| 0                | 0                | 0                | 0                | 0                | 4.36E-05         | 0.0001     | .       | .       | .       |
| .                | .                | .                | .                | .                | .                | .          | .       | .       | .       |
| .                | .                | .                | .                | .                | .                | .          | .       | .       | .       |
| 0                | 0                | 0                | 0                | 0.0011           | 0                | 0          | 0.00072 | 0       | 0       |
| .                | .                | .                | .                | .                | .                | .          | .       | .       | .       |
| 0.0011           | 5.80E-05         | 0                | 0.0004           | 0                | 0.0005           | 0.0011     | 0.0005  | 0       | 0       |
| 0.0011           | 0                | 0                | 4.49E-05         | 0                | 0                | 0.0001     | .       | .       | .       |
| 0                | 5.82E-05         | 0                | 3.61E-05         | 0.0006           | 0.003            | 0.003      | 0.00101 | 0       | 0       |
| 0                | 0                | 0                | 2.01E-05         | 0                | 0.0001           | 0.0001     | .       | .       | .       |

| GME_AP  | GME_Israel | GME_SD | GME_TP | GME_CA  |
|---------|------------|--------|--------|---------|
| .       | .          | .      | .      | .       |
| .       | .          | .      | .      | .       |
| .       | .          | .      | .      | .       |
| .       | .          | .      | .      | .       |
| .       | .          | .      | .      | .       |
| 0.00407 | 0          | 0      | 0      | 0       |
| .       | .          | .      | .      | .       |
| 0.00292 | 0          | 0      | 0      | 0       |
| .       | .          | .      | .      | .       |
| 0       | 0          | 0      | 0      | 0.00379 |
| .       | .          | .      | .      | .       |
